# Supplementary material
Source: Springer Nature journal article supplement (https://www.springermedizin.de/resource/supplementary/12879_2013_2936_MOESM5_ESM.pdf/9445392)

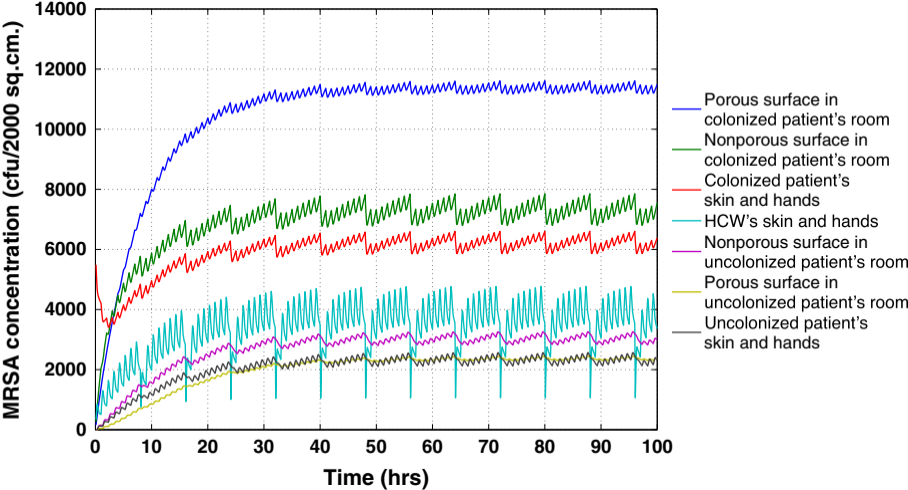

Supplement: MOESM5 [file 9445392]
